# Supplementary material
Source: MDPI journal article supplement (https://www.mdpi.com/1424-2818/16/5/288)
Supplement: s1 [file s1]

# Supplementary Materials

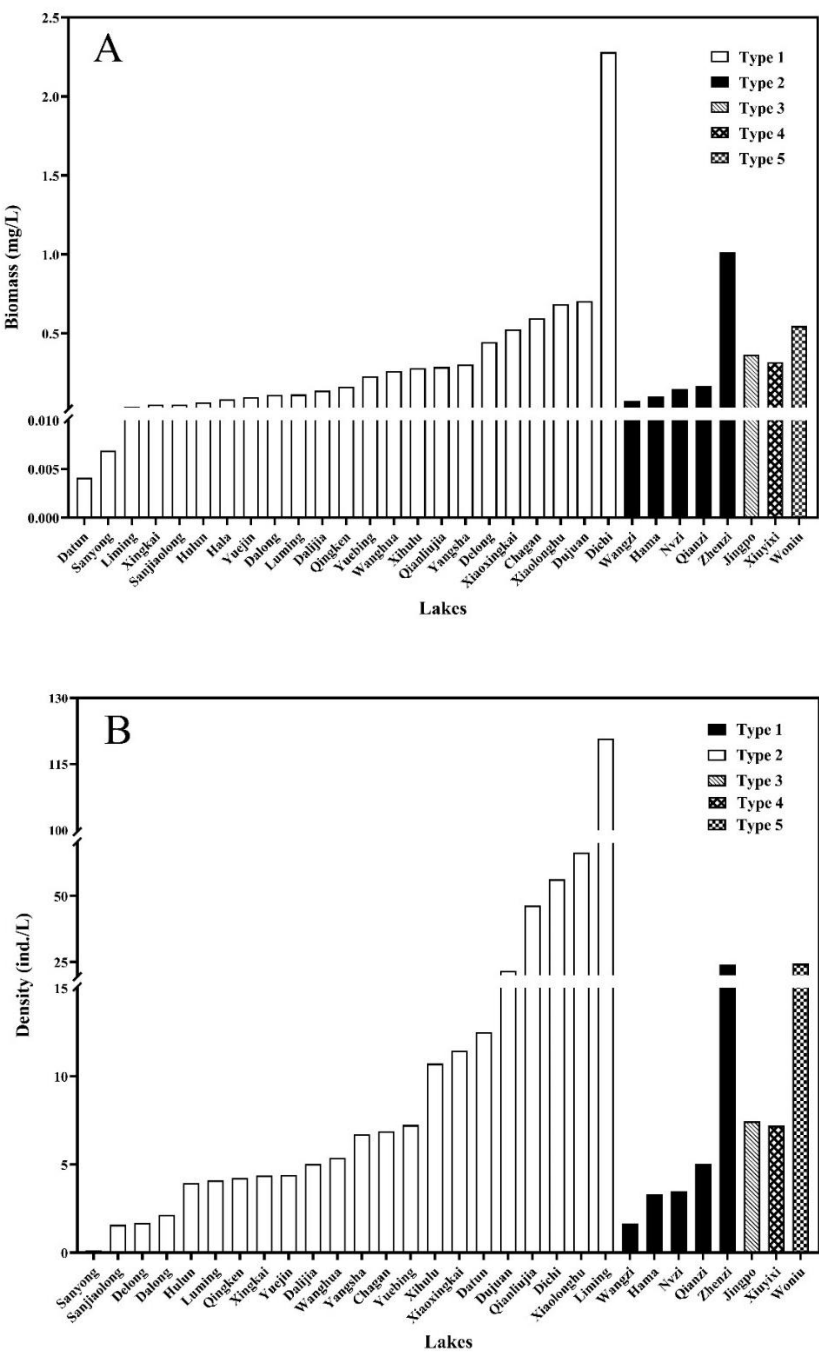

**Figure S1.** The biomass (A) and density (B) of calanoid copepods in 31 lakes.

**Table S1.** Physical and chemical characteristics of 31 lakes with calanoid copepods occurrences.

| Lake        | Lat.<br>(°N) | Lng<br>(°E) | Type | Altitude<br>(m a.s.l) | Salinity<br>(g/L) | Depth<br>(m) | pH        | Conductivity<br>(μS/cm) | Turbidity<br>(NTU) | TN<br>(mg/L) | TP<br>(mg/L) | NH <sub>4</sub> -N<br>(mg/L) | Chl <i>a</i><br>(μg/L) | DOC<br>(mg/L) |
|-------------|--------------|-------------|------|-----------------------|-------------------|--------------|-----------|-------------------------|--------------------|--------------|--------------|------------------------------|------------------------|---------------|
| Wanghua     | 46.55        | 125.29      | 1    | 135                   | 0.45              | 1.8          | 9.02±0    | 958.67±4.04             | 20.2±1             | 1.42±0.02    | 0.06±0       | 0.11±0.01                    | 15.05±2.88             | 10.59±0.46    |
| Datun       | 45.93        | 123.75      | 1    | 124                   | 0.25              | 1.5          | 8.92±0.04 | 590±12.73               | 34.25±4.31         | 1.16±0.01    | 0.11±0       | 0.1±0                        | 20.13±2.37             | 7.01±1.11     |
| Liming      | 46.60        | 125.13      | 1    | 143                   | 0.23              | 1.5          | 8.9±0.02  | 517.33±1.15             | 21.53±1.45         | 0.89±0.06    | 0.05±0.01    | 0.07±0                       | 11.03±1.06             | 6.48±0.34     |
| Xihulu      | 46.69        | 124.21      | 1    | 122                   | 0.42              | 1.5          | 9.1±0.02  | 902.67±2.08             | 45.03±1.53         | 1.33±0.04    | 0.07±0       | 0.08±0.01                    | 21.73±1.77             | 10.17±4.13    |
| Sanyong     | 46.56        | 125.11      | 1    | 143                   | 0.52              | 1.9          | 9.21±0.03 | 1057.33±2.31            | 40.63±0.45         | 1.69±0.08    | 0.1±0.01     | 0.1±0                        | 39.35±2.67             | 11.66±2.11    |
| Hulun       | 49.30        | 117.67      | 1    | 534                   | 0.86              | 4.6          | 9.23±0.02 | 1729.2±1.92             | 34.62±4.01         | 2.08±0.26    | 0.14±0.03    | 0.06±0.01                    | 25.43±4.3              | 45.12±3.92    |
| Chagan      | 45.21        | 124.42      | 1    | 111                   | 0.42              | 1.9          | 9.45±0.02 | 987±7.94                | 74.6±7.76          | 1.58±0.11    | 0.11±0.01    | 0.1±0.01                     | 33.62±2.52             | 7.14±1.16     |
| Yuebing     | 46.45        | 124.36      | 1    | 126                   | 0.54              | 2            | 9.15±0.02 | 1129.33±16.07           | 38.57±4.25         | 1.89±0.04    | 0.1±0.01     | 0.18±0.07                    | 16.96±2.06             | 30.65±5.96    |
| Delong      | 46.83        | 124.06      | 1    | 126                   | 0.23              | 2.4          | 8.77±0.29 | 489.67±21.36            | 3.63±0.46          | 0.96±0.06    | 0.05±0.01    | 0.1±0.01                     | 11.31±1.54             | 9.03±0.67     |
| Dichi       | 47.31        | 120.48      | 1    | 1123                  | 0.04              | 6.8          | 8.66±0.14 | 107.00±0                | 3.4±0.57           | 0.63±0.16    | 0.06±0       | 0.15±0.03                    | 12±0.59                | 5.28±0.49     |
| Dalong      | 42.34        | 126.39      | 1    | 625                   | 0.14              | 49.7         | 8.64±0.01 | 322.5±0.71              | 0.65±0.07          | 0.64±0.01    | 0.02±0       | 0.06±0                       | -                      | 4.75          |
| Xiaoxingkai | 45.37        | 132.37      | 1    | 55                    | 0.11              | 2.7          | 8.91±0.1  | 253.8±2.28              | 66.64±4.66         | 0.9±0.07     | 0.05±0       | 0.08±0                       | 10.7±1.8               | 6.3±0.17      |
| Xingkai     | 45.35        | 132.36      | 1    | 55                    | 0.07              | 4.8          | 8.37±0.26 | 162.6±0.55              | 105.28±6.04        | 0.78±0.07    | 0.12±0       | 0.06±0.01                    | 4.98±1.19              | 4.32±0.22     |
| Dalijia     | 48.29        | 134.28      | 1    | 18                    | 0.07              | 2.8          | 9.69±0.03 | 169.67±0.58             | 5.33±0.38          | 1.17±0.11    | 0.04±0.004   | 0.188±0.06                   | 26.79±1.904            | 10.83±0.239   |
| Hala        | 49.87        | 118.66      | 1    | 520                   | 0.33              | 30           | 9.42±0.03 | 718.67±3.79             | 44.33±10.6         | 2.98±0       | 0.19±0       | 0.13±0                       | 42.22±0                | 17.51±0       |
| Xiaolonghu  | 46.80        | 124.32      | 1    | 126                   | 1.17              | 0.9          | 9.53±0.29 | 2321.33±0.58            | 41.67±2.1          | 2.14±0.06    | 0.09±0       | 0.1±0.03                     | 11.46±1.64             | 80.86±16.51   |
| Yuejin      | 45.99        | 129.02      | 1    | 88                    | 0.04              | 1.8          | 9.84±0.01 | 107±1.63                | 27.9±4.13          | 2.24±0.33    | 0.15±0.02    | 0.09±0.01                    | 80.28±10.09            | 11.64±0.31    |
| Qingken     | 46.38        | 125.51      | 1    | 132                   | 1.38              | 1.9          | 9.19±0.03 | 2739.33±22.14           | 68.9±3.77          | 2.16±0.05    | 0.13±0.01    | 0.23±0.05                    | 20.4±1.85              | 95.4±1.47     |
| Sanjiaolong | 42.38        | 126.45      | 1    | 833                   | 0.04              | 66.1         | 8.03      | 90                      | 0                  | 0.47         | 0.03         | 0.08                         | -                      | 2.48          |
| Yangsha     | 46.13        | 123.24      | 1    | 139                   | 0.15              | 1.1          | 9.10±0.03 | 311.67±3.06             | 191.9±2.61         | 1.18±0.09    | 0.11±0.01    | 0.09±0.03                    | 27.6±6.88              | 5.37±0.37     |
| Qianliujia  | 45.95        | 123.37      | 1    | 125                   | 0.93              | 0.7          | 9.37±0.01 | 1700.67±288.1           | 222.17±22.27       | 2.66±0.05    | 0.35±0.01    | 0.11±0                       | 26.23±3.44             | 68.28±11.36   |
| Dujuan      | 47.42        | 120.56      | 1    | 1244                  | 0.02              | 1.7          | 9.65±0.28 | 51.00±4.24              | 2.5±1.27           | 0.86±0.06    | 0.04±0       | 0.33±0.06                    | 8.26±3.11              | 13.53±1.1     |
| Luming      | 47.40        | 120.49      | 1    | 1190                  | 0.02              | 1.7          | 9.15±0.44 | 46.00±0                 | 1.00±0.42          | 0.79±0.01    | 0.03±0       | 0.42±0                       | 2.92±0.50              | 13.97±0.00    |

|         |       |        |   |     |      |      |           |                |             |            |           |           |             |              |
|---------|-------|--------|---|-----|------|------|-----------|----------------|-------------|------------|-----------|-----------|-------------|--------------|
| Nvzi    | 44.93 | 123.98 | 2 | 111 | 2.86 | 0.5  | 9.97±0.01 | 5375.00±13.11  | 103.93±7.05 | 6.02±0.87  | 1.88±0.05 | 0.14±0.02 | 67.58±10.28 | 141.9±8.28   |
| Zhenzi  | 45.05 | 123.86 | 2 | 120 | 4.01 | 1.1  | 9.72±0.01 | 7349.67±13.5   | 101.37±8.6  | 3.2±0.13   | 0.86±0.15 | 0.11±0.02 | 55.01±13.37 | 102.24±49.52 |
| Hama    | 45.57 | 124.11 | 2 | 111 | 1.52 | 1.7  | 9.78±0.02 | 2936.67±5.77   | 63.37±1.12  | 5.48±1.71  | 0.31±0.06 | 0.11±0.00 | 104.2±8.14  | 124.03±17.62 |
| Wangzi  | 45.18 | 123.88 | 2 | 126 | 1.41 | 0.9  | 9.74±0.01 | 5266±3542.6    | 134.35±5.87 | 4.05±0.22  | 0.41±0.01 | 0.14±0.03 | 96.98±22.53 | 117.55±24.54 |
| Qianzi  | 45.04 | 124.05 | 2 | 124 | 0.38 | 1.4  | 9.64±0.02 | 773.33±1.15    | 34.20±1.28  | 3.61±0.21  | 0.45±0.03 | 0.16±0.01 | 132.5±14.15 | 8.74±0.36    |
| Jingpo  | 43.85 | 128.90 | 3 | 341 | 0.05 | 18.5 | 8.24±0.31 | 121.17±3.25    | 42.37±27.38 | 1.83±0.14  | 0.07±0.01 | 0.11±0.01 | 4.29±2.41   | 5.95±0.29    |
| Xiuyixi | 46.52 | 124.80 | 4 | 140 | 3.05 | 2.4  | 9.46±0.03 | 5699.00±16.37  | 13.53±3.04  | 11.14±2.11 | 2.18±0.05 | 0.19±0.02 | 35.83±4.27  | 242.13±10.17 |
| Woniu   | 46.83 | 124.38 | 5 | 122 | 5.65 | 2.9  | 9.49±0.02 | 10080.00±23.64 | 2.27±0.4    | 11.53±0.95 | 7.15±0.13 | 0.25±0.06 | 1.88±0.42   | 223.20±40.69 |

\*Latitude (Lat.), Longitude (Lng.).

**Table S2.** The body length (average  $\pm$  standard deviation) of calanoid copepods (adult) in 31 lakes.

| Species                                              | Body length (mm)                                                                                                                                                                                                                                                                                                                                                                      |
|------------------------------------------------------|---------------------------------------------------------------------------------------------------------------------------------------------------------------------------------------------------------------------------------------------------------------------------------------------------------------------------------------------------------------------------------------|
| <b>Family Temoridae Giesbrecht, 1893</b>             |                                                                                                                                                                                                                                                                                                                                                                                       |
| <i>Heterocope soldatovi</i> Rylov, 1922              | Dalijia (1.26 $\pm$ 0.1)                                                                                                                                                                                                                                                                                                                                                              |
| <b>Family Centropagidae Giesbrecht, 1893</b>         |                                                                                                                                                                                                                                                                                                                                                                                       |
| <i>Boeckella triarticulata</i> (Thomson G.M., 1883)  | Xingkai (0.95 $\pm$ 0.08), Sanjiaolong (1.04 $\pm$ 0.21), Yuejin (1.05 $\pm$ 0.21), Xiaolonghu (1.04 $\pm$ 0.22), Qianzi (1.34 $\pm$ 0.43), Hala (1.29 $\pm$ 0.16), Hulun (0.99 $\pm$ 0.13)                                                                                                                                                                                           |
| <i>Sinocalanus doerrii</i> (Brehm, 1909)             | Xingkai (1.17 $\pm$ 0.13), Dalijia (1.07 $\pm$ 0.22), Xiaoxingkai (1.19 $\pm$ 0.18), Delong (1.32 $\pm$ 0.21), Jingpo (1.2 $\pm$ 0.26), Yuebing (1.12 $\pm$ 0.18), Wanghua (1.31 $\pm$ 0.17), Xihulu (1.14 $\pm$ 0.2), Sanyong (1.21 $\pm$ 0.22), Liming (1.21 $\pm$ 0.17), Chagan (1.2 $\pm$ 0.25), Yangsha (1.25 $\pm$ 0.15), Qianliujia (1.45 $\pm$ 0.34), Datun (1.01 $\pm$ 0.17) |
| <b>Family Diaptomidae Baird, 1850</b>                |                                                                                                                                                                                                                                                                                                                                                                                       |
| <i>Acanthodiaptomus pacificus</i> (Burckhardt, 1913) | Dalong (1.07 $\pm$ 0.18)                                                                                                                                                                                                                                                                                                                                                              |
| <i>Arctodiaptomus rectispinosus</i> Kikuchi K., 1940 | Xiuyixi (1.31 $\pm$ 0.21), Nvzi (1.44 $\pm$ 0.2), Zhenzi (1.33 $\pm$ 0.23)                                                                                                                                                                                                                                                                                                            |
| <i>Neutrodiaptomus genogibbosus</i> Shen, 1956       | Dujuan (1.22 $\pm$ 0.19), Luming (1.43 $\pm$ 0.09), Dichi (1.13 $\pm$ 0.14)                                                                                                                                                                                                                                                                                                           |
| <i>Neutrodiaptomus pachypoditus</i> (Rylov, 1925)    | Jingpo (0.98 $\pm$ 0.17)                                                                                                                                                                                                                                                                                                                                                              |
| <i>Metadiaptomus asiaticus</i> (Uljanin, 1875)       | Woniu (1.1 $\pm$ 0.17)                                                                                                                                                                                                                                                                                                                                                                |
| <i>Sinodiaptomus chaffanjoni</i> (Richard, 1897)     | Hama (1.53 $\pm$ 0.26)                                                                                                                                                                                                                                                                                                                                                                |
| <i>Sinodiaptomus sarsi</i> (Rylov, 1923)             | Qingken (1.25 $\pm$ 0.27), Wanghua (1.17 $\pm$ 0.12), Qianliujia (1.31 $\pm$ 0.22), Wangzi (1.35 $\pm$ 0.46)                                                                                                                                                                                                                                                                          |
